# Supplementary material for: Age- and sex-specific effects of a long-term lifestyle intervention on body weight and cardiometabolic health markers in adults with prediabetes: results from the diabetes prevention study PREVIEW
Source: PubMed Central journal article supplement (PMC9283166; doi:10.1007/s00125-022-05716-3), 2022-05-25
Supplement: 125_2022_5716_MOESM1_ESM.pdf [file 125_2022_5716_MOESM1_ESM.pdf]

## **Electronic Supplementary Material**

Age- and sex-specific effects of a long-term lifestyle intervention on body weight and cardiometabolic health markers in adults with prediabetes: results from the diabetes prevention study PREVIEW

### **ESM Methods**

#### **Statistical analysis**

In the present study, the following factors, which may influence the outcomes of interest, were considered covariates. Ethnicity (White, Asian, Black, Arabic, Hispanic, or other), smoking status (daily, less than weekly, or no smoking) and alcohol drinking (yes or no) was self-reported by participants at baseline. Dietary intake was assessed using four day food records. Total physical activity and different types of physical activity (i.e., light physical activity, moderate to vigorous moderate physical activity and sedentary time) were assessed using a hip-worn ActiSleep+ (ActiGraph LLC, Pensacola, FL) accelerometer. Total physical activity was estimated using mean activity counts (counts/min) over valid wear time. Troiano cut points were used to assess time (min/day) spent at different types of physical activity (i.e. sedentary time <100 counts/min, light physical activity 100–2020 counts/min, moderate physical activity <2020 counts/min and vigorous physical activity <5999 counts/min. Moderate to vigorous physical activity was the sum of moderate and vigorous activity physical activity.

**ESM Table 1.** Human Ethics Committees for each intervention centre

| <b>Intervention centers</b>                   | <b>Human Ethics Committees</b>                                                            |
|-----------------------------------------------|-------------------------------------------------------------------------------------------|
| Denmark<br>(University of Copenhagen)         | The Research Ethics Committees of the Capital Region                                      |
| Finland<br>(University of Helsinki)           | Coordinating Ethical Committee of HUS (Helsinki and Uusimaa Hospital District)            |
| The Netherlands<br>(University of Maastricht) | Medical Ethics Committee of the Maastricht University Medical Centre                      |
| The U.K.<br>(University of Nottingham)        | UK National Research Ethics Service (NRES) and East Midlands (Leicester) Ethics Committee |
| Spain<br>(University of Navarra)              | Research Ethics Committee of the University of Navarra                                    |
| Bulgaria<br>(Medical University of Sofia)     | Commission on Ethics in Scientific Research with the Medical University-Sofia (KENIMUS)   |
| Australia<br>(University of Sydney)           | The University of Sydney, Human Research Ethics Committee (HREC)                          |
| New Zealand<br>(University of Auckland)       | Health and Disability Ethics Committees (HDEC)                                            |

**ESM Table 2.** Overview of data collection over 3 years at different time points

| <b>Outcome</b>                                                                                             | <b>CID1<br/>(0<br/>weeks)</b> | <b>CID2<br/>(8<br/>weeks)</b> | <b>CID3<br/>(26<br/>weeks)</b> | <b>CID4<br/>(52<br/>weeks)</b> | <b>CID5<br/>(78<br/>weeks)</b> | <b>CID6<br/>(104<br/>weeks)</b> | <b>CID7<br/>(156<br/>weeks)</b> |
|------------------------------------------------------------------------------------------------------------|-------------------------------|-------------------------------|--------------------------------|--------------------------------|--------------------------------|---------------------------------|---------------------------------|
| Socio-demographics<br>(age, sex, ethnicity, baseline smoking status and<br>baseline alcohol drinking)      | ×                             |                               |                                |                                |                                |                                 |                                 |
| Anthropometry<br>(body weight and waist circumference)                                                     | ×                             | ×                             | ×                              | ×                              | ×                              | ×                               | ×                               |
| Body composition<br>(fat mass, fat-free mass, bone mineral content and<br>bone mineral density)            | ×                             | ×                             | ×                              | ×                              |                                | ×                               | ×                               |
| Glucose metabolism<br>(fasting plasma glucose and HbA <sub>1c</sub> )                                      | ×                             | ×                             | ×                              | ×                              |                                | ×                               | ×                               |
| Glucose metabolism<br>(2h plasma glucose)                                                                  | ×                             |                               | ×                              | ×                              |                                | ×                               | ×                               |
| Blood pressure<br>(systolic blood pressure and diastolic blood<br>pressure)                                | ×                             | ×                             | ×                              | ×                              |                                | ×                               | ×                               |
| Lipid metabolism<br>(total cholesterol, high-density lipoprotein<br>cholesterol and fasting triglycerides) | ×                             | ×                             | ×                              | ×                              |                                | ×                               | ×                               |
| Dietary intake <sup>a</sup>                                                                                | ×                             |                               | ×                              | ×                              |                                | ×                               | ×                               |
| Physical activity <sup>a</sup>                                                                             | ×                             |                               | ×                              | ×                              |                                | ×                               | ×                               |

<sup>a</sup> Baseline dietary intake and physical activity and changes in dietary intake and physical activity from baseline were calculated and added to the linear mixed model. The macronutrient composition of the low-energy diet (3400 kJ/day, protein 43.7 E%, carbohydrate 41.2 E%, fat 15.1 E%, fibre 13.3 g/day) will be used to estimate dietary intake at 8 weeks. Physical activity at 0 weeks was used to estimate physical activity at 8 weeks, assuming that physical activity did not change from during the weight loss phase. Average dietary intake at 52 and 104 weeks was used to estimate dietary intake at 78 weeks. Average physical activity at 52 and 104 weeks was used to estimate physical activity at 78 weeks. CID, clinical investigation day.

**ESM Table 3.** Ethnicity by sex and age

|          | All participants<br>(n=2223) | Age group          |                        |                   | Sex               |                |
|----------|------------------------------|--------------------|------------------------|-------------------|-------------------|----------------|
|          |                              | Younger<br>(n=783) | Middle-aged<br>(n=319) | Older<br>(n=1121) | Women<br>(n=1503) | Men<br>(n=720) |
| White    | 1947 (87.6%)                 | 600 (76.6%)        | 274 (85.9%)            | 1073 (95.7%)      | 1299 (86.4%)      | 648 (90.0%)    |
| Asian    | 60 (2.7%)                    | 40 (5.1%)          | 8 (2.5%)               | 12 (1.1%)         | 39 (2.6%)         | 21 (2.9%)      |
| Black    | 40 (1.8%)                    | 22 (2.8%)          | 7 (2.2%)               | 11 (1.0%)         | 30 (2.0%)         | 10 (1.4%)      |
| Arabic   | 5 (0.2%)                     | 1 (0.1%)           | 3 (0.9%)               | 1 (0.1%)          | 3 (0.2%)          | 2 (0.3%)       |
| Hispanic | 44 (2.0%)                    | 28 (3.6%)          | 12 (3.8%)              | 4 (0.4%)          | 34 (2.3%)         | 10 (1.4%)      |
| Other    | 127 (5.7%)                   | 92 (11.7%)         | 15 (4.7%)              | 20 (1.8%)         | 98 (6.5%)         | 29 (4.0%)      |

Data are n (%). Younger adults: 25–45 years; middle-aged adults: 46–54 years; older adults: 55–70 years.

**ESM Table 4.** Dietary intake and physical activity by age and sex (n=2223)

|                                     | Group |             | 0 weeks     | 26 weeks    | 52 weeks    | 104 weeks   | 156 weeks   | <i>p</i> for interaction of group and time | <i>p</i> for group main effect | <i>p</i> for time main effect |
|-------------------------------------|-------|-------------|-------------|-------------|-------------|-------------|-------------|--------------------------------------------|--------------------------------|-------------------------------|
| Carbohydrate, E%                    | Age   | Younger     | 41 (7)a     | 40 (6)a     | 41 (6)a     | 40 (6)a     | 40 (5)a     | <0.001                                     | –                              | –                             |
|                                     |       | Middle-aged | 39 (8)b     | 40 (7)a     | 40 (6)a     | 40 (7)a     | 39 (7)a     |                                            |                                |                               |
|                                     |       | Older       | 39 (6)b     | 40 (7)a     | 40 (6)a     | 40 (6)a     | 39 (6)a     |                                            |                                |                               |
|                                     | Sex   | Women       | 41 (7)a     | 40 (6)a     | 40 (6)a     | 40 (6)a     | 40 (6)a     | 0.004                                      | –                              | –                             |
|                                     |       | Men         | 39 (7)b     | 40 (7)a     | 40 (7)a     | 40 (6)a     | 39 (7)a     |                                            |                                |                               |
| Protein, E%                         | Age   | Younger     | 17 (4)      | 20 (3)      | 20 (3)      | 20 (3)      | 20 (3)      | 0.07                                       | 0.002                          | <0.001                        |
|                                     |       | Middle-aged | 18 (4)      | 21 (4)      | 20 (3)      | 20 (4)      | 21 (4)      |                                            |                                |                               |
|                                     |       | Older       | 18 (3)      | 21 (4)      | 20 (3)      | 20 (3)      | 20 (3)      |                                            |                                |                               |
|                                     | Sex   | Women       | 17 (3)      | 20 (4)      | 20 (3)      | 20 (3)      | 20 (3)      | 0.18                                       | <0.001                         | <0.001                        |
|                                     |       | Men         | 18 (4)      | 21 (4)      | 20 (3)      | 20 (3)      | 20 (4)      |                                            |                                |                               |
| Fat, E%                             | Age   | Younger     | 38 (6)      | 35 (6)      | 35 (5)      | 36 (5)      | 36 (4)      | 0.85                                       | <0.001                         | <0.001                        |
|                                     |       | Middle-aged | 37 (6)      | 34 (6)      | 35 (6)      | 35 (5)      | 35 (5)      |                                            |                                |                               |
|                                     |       | Older       | 37 (6)      | 33 (6)      | 34 (6)      | 35 (6)      | 35 (5)      |                                            |                                |                               |
|                                     | Sex   | Women       | 37 (6)      | 34 (6)      | 35 (5)      | 35 (5)      | 36 (5)      | 0.25                                       | <0.001                         | <0.001                        |
|                                     |       | Men         | 36 (6)      | 33 (6)      | 34 (6)      | 34 (6)      | 35 (5)      |                                            |                                |                               |
| Fibre, g/day                        | Age   | Younger     | 22 (8)      | 22 (6)      | 22 (6)      | 21 (5)      | 21 (5)      | 0.10                                       | <0.001                         | <0.001                        |
|                                     |       | Middle-aged | 22 (8)      | 22 (6)      | 22 (7)      | 21 (6)      | 21 (6)      |                                            |                                |                               |
|                                     |       | Older       | 22 (8)      | 23 (7)      | 23 (7)      | 22 (6)      | 21 (7)      |                                            |                                |                               |
|                                     | Sex   | Women       | 21 (7)      | 22 (6)      | 22 (6)      | 21 (5)      | 21 (6)      | 0.17                                       | <0.001                         | <0.001                        |
|                                     |       | Men         | 23 (9)      | 23 (7)      | 24 (7)      | 22 (6)      | 22 (6)      |                                            |                                |                               |
| Energy, kcal/day                    | Age   | Younger     | 2221 (668)a | 1673 (378)a | 1694 (419)a | 1651 (414)a | 1654 (379)a | <0.001                                     | –                              | –                             |
|                                     |       | Middle-aged | 2111 (575)b | 1657 (403)a | 1653 (392)a | 1630 (389)a | 1593 (348)a |                                            |                                |                               |
|                                     |       | Older       | 2025 (553)c | 1649 (399)a | 1636 (408)a | 1599 (363)a | 1594 (371)a |                                            |                                |                               |
|                                     | Sex   | Women       | 2024 (569)b | 1601 (365)b | 1607 (383)b | 1575 (349)b | 1571 (357)b | <0.001                                     | –                              | –                             |
|                                     |       | Men         | 2278 (642)a | 1780 (418)a | 1766 (444)a | 1719 (439)a | 1707 (385)a |                                            |                                |                               |
| Total physical activity, counts/min | Age   | Younger     | 304 (99)a   | 335 (98)a   | 329 (92)a   | 318 (85)a   | 308 (87)a   | 0.05                                       | –                              | –                             |
|                                     |       | Middle-aged | 298 (101)ab | 342 (120)a  | 339 (116)a  | 325 (110)a  | 311 (108)a  |                                            |                                |                               |
|                                     |       | Older       | 281 (108)b  | 319 (115)b  | 306 (114)b  | 300 (109)b  | 284 (113)b  |                                            |                                |                               |
|                                     | Sex   | Women       | 288 (93)a   | 320 (98)b   | 314 (94)b   | 305 (90)b   | 289 (87)b   | 0.003                                      | –                              | –                             |
|                                     |       | Men         | 299 (126)a  | 343 (132)a  | 330 (131)a  | 321 (122)a  | 313 (131)a  |                                            |                                |                               |

Data are unadjusted mean (SD). Younger adults: 25–45 years; middle-aged adults: 46–54 years; older adults: 55–70 years. Analyses were performed based on imputed data and using a linear mixed model with repeated measures adjusted for sex or age and time as fixed effects and participant identifier and intervention centre as random effects. Time by age or sex interaction terms were added. Post hoc multiple comparisons with Bonferroni adjustment or pairwise comparisons (independent samples *t* test) were performed to compare age groups or women and men at each time point, where appropriate. Values with the different lowercase letters (a, b, and c) in a column are significantly different,  $p < 0.05$ .

**ESM Table 5.** Associations of weight change with changes in cardiometabolic health markers (n=2223)

|                                                                 | Mean changes<br>(95% CI)<br>in all participants <sup>a</sup> | <i>p</i> value <sup>b</sup> | Relative mean changes<br>(95% CI) by age <sup>d</sup> |                      |                       | Relative mean changes<br>(95% CI) by sex <sup>d</sup> |                       |
|-----------------------------------------------------------------|--------------------------------------------------------------|-----------------------------|-------------------------------------------------------|----------------------|-----------------------|-------------------------------------------------------|-----------------------|
|                                                                 |                                                              |                             | Younger <sup>c</sup>                                  | Middle-aged          | Older                 | Men <sup>c</sup>                                      | Women                 |
| Percentage weight loss (each 10%)<br>during rapid weight loss   |                                                              |                             |                                                       |                      |                       |                                                       |                       |
| Fasting plasma glucose, mmol/l                                  | -0.38 (-0.445, -0.32)                                        | <0.001                      | 0 (Ref.)                                              | -0.005 (-0.19, 0.18) | -0.10 (-0.21, 0.01)   | 0 (Ref.)                                              | 0.17 (0.06, 0.28)e    |
| HbA <sub>1c</sub> , mmol/mol                                    | -1.16 (-1.38, -0.94)                                         | <0.001                      | 0 (Ref.)                                              | 0.11 (-0.58, 0.80)   | -0.19 (-0.61, 0.23)   | 0 (Ref.)                                              | 0.14 (-0.26, 0.55)    |
| Triacylglycerol, mmol/l                                         | -0.27 (-0.32, -0.21)                                         | <0.001                      | 0 (Ref.)                                              | -0.08 (-0.25, 0.09)  | -0.006 (-0.11, 0.10)  | 0 (Ref.)                                              | 0.17 (0.07, 0.26)e    |
| HDL-cholesterol, mmol/l                                         | -0.07 (-0.09, -0.05)                                         | <0.001                      | 0 (Ref.)                                              | 0.08 (0.02, 0.14)e   | 0.002 (-0.03, 0.04)   | 0 (Ref.)                                              | -0.06 (-0.09, -0.02)e |
| LDL-cholesterol, mmol/l                                         | -0.42 (-0.48, -0.35)                                         | <0.001                      | 0 (Ref.)                                              | 0.16 (-0.04, 0.37)   | 0.03 (-0.10, 0.15)    | 0 (Ref.)                                              | 0.12 (0.001, 0.24)e   |
| Systolic blood pressure, mmHg                                   | -4.49 (-5.96, -3.02)                                         | <0.001                      | 0 (Ref.)                                              | -0.15 (-4.32, 4.72)  | -3.10 (-5.87, -0.32)e | 0 (Ref.)                                              | 3.07 (0.36, 5.77)e    |
| Diastolic blood pressure, mmHg                                  | -3.08 (-3.99, -2.17)                                         | <0.001                      | 0 (Ref.)                                              | 0.50 (-2.33, 3.33)   | -1.44 (-3.15, 0.28)   | 0 (Ref.)                                              | 3.21 (1.54, 4.88)e    |
| Percentage weight regain (each 5%)<br>during weight maintenance |                                                              |                             |                                                       |                      |                       |                                                       |                       |
| Fasting plasma glucose, mmol/l                                  | 0.13 (0.11, 0.15)                                            | <0.001                      | 0 (Ref.)                                              | 0.06 (-0.0004, 0.12) | 0.05 (0.007, 0.10)e   | 0 (Ref.)                                              | 0.03 (-0.01, 0.07)    |
| HbA <sub>1c</sub> , mmol mol <sup>-1</sup>                      | 0.88 (0.81, 0.95)                                            | <0.001                      | 0 (Ref.)                                              | 0.25 (0.05, 0.45)e   | 0.16 (0.01, 0.32)e    | 0 (Ref.)                                              | -0.04 (-0.18, 0.10)   |
| Triacylglycerol, mmol/l                                         | 0.13 (0.11, 0.15)                                            | <0.001                      | 0 (Ref.)                                              | -0.04 (-0.09, 0.01)  | -0.04 (-0.08, 0.0006) | 0 (Ref.)                                              | -0.002 (-0.04, 0.03)  |
| HDL-cholesterol, mmol/l                                         | -0.04 (-0.04, -0.03)                                         | <0.001                      | 0 (Ref.)                                              | -0.004 (-0.02, 0.01) | -0.009 (-0.02, 0.005) | 0 (Ref.)                                              | 0.006 (-0.007, 0.02)  |
| LDL-cholesterol, mmol/l                                         | 0.03 (0.008, 0.05)                                           | 0.007                       | 0 (Ref.)                                              | 0.03 (-0.03, 0.10)   | 0.009 (-0.04, 0.06)   | 0 (Ref.)                                              | -0.0004 (-0.05, 0.05) |
| Systolic blood pressure, mmHg                                   | 1.76 (1.29, 2.23)                                            | <0.001                      | 0 (Ref.)                                              | 0.54 (-0.79, 1.87)   | 1.41 (0.38, 2.44)e    | 0 (Ref.)                                              | 0.45 (-0.52, 1.42)    |
| Diastolic blood pressure, mmHg                                  | 1.10 (0.81, 1.40)                                            | <0.001                      | 0 (Ref.)                                              | 0.07 (-0.76, 0.91)   | 0.62 (-0.03, 1.26)    | 0 (Ref.)                                              | -0.07 (-0.68, 0.53)   |

Younger adults: 25–45 years; middle-aged adults: 46–54 years; older adults: 55–70 years. Analyses were performed using a linear mixed model including sex, age, ethnicity, baseline BMI, baseline smoking status, baseline alcohol drinking, baseline values of the outcome being considered, baseline energy intake and physical activity and percentage weight loss from baseline as fixed covariates and intervention centre as random effects. For the associations during weight maintenance, the models were additionally included intervention arm and percentage weight regain from 8 weeks. Percentage weight loss by age group or sex interaction terms were added, where appropriate.

<sup>a</sup>Values are adjusted mean changes (95% CI) in outcomes from baseline or from 8 weeks in all participants associated with each 8% of weight loss or 5% of weight regain.

<sup>b</sup>*p* for mean changes in all participants

<sup>c</sup>Reference group

<sup>d</sup>Values are relative mean changes (95% CI) in outcomes from baseline or from 8 weeks compared with the reference group associated with each 8% of weight loss or 5% of weight regain <sup>e</sup>Significant relative mean changes compared with the reference group, *p*<0.05

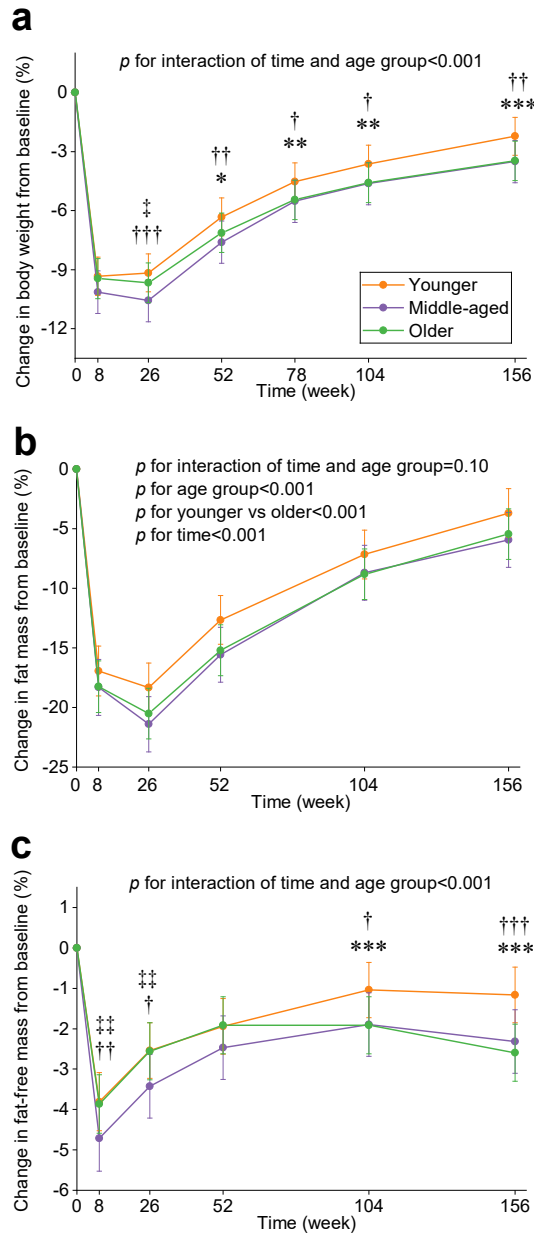

**ESM Fig. 1** Changes in body weight and body composition by age group (n=2223). Values are estimated marginal mean (95% CI) in changes from baseline in percentage of body weight (a), percentage of fat mass (b), and percentage of fat-free mass (c). Younger adults: 25–45 years; middle-aged adults: 46–54 years; older adults: 55–70 years. Analyses were performed using a linear mixed model including sex, age, ethnicity, baseline BMI, baseline smoking status, baseline alcohol drinking, baseline values of the outcome being considered, baseline energy intake and physical activity, time-varying changes in energy intake and physical activity from baseline, intervention arm, time and interaction of time and age group as fixed covariates and participant identifier and intervention centre as random effects. Post hoc multiple comparisons with Bonferroni adjustment were performed to compare age groups at each time point, where appropriate. Older vs younger adults \* $p$  < 0.05, \*\* $p$  < 0.01, and \*\*\* $p$  < 0.001; middle-aged vs younger adults † $p$  < 0.05 and †† $p$  < 0.01; older vs middle-aged adults ‡ $p$  < 0.05, ‡‡ $p$  < 0.01, and ‡‡‡ $p$  < 0.001

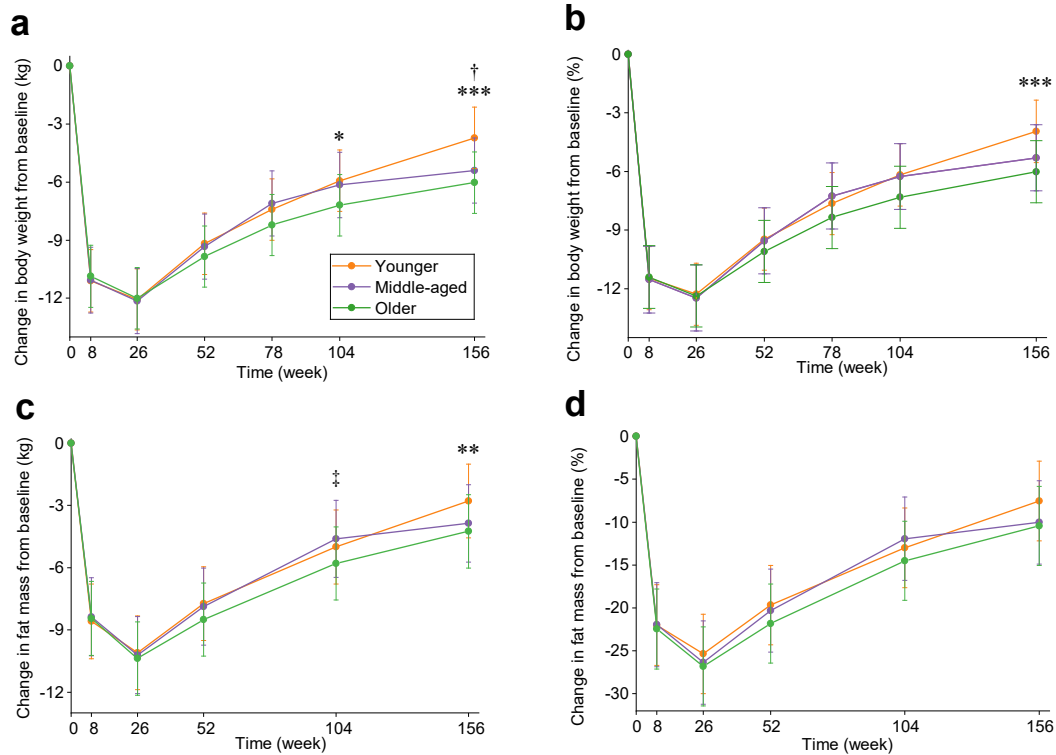

**ESM Fig. 2** Changes in body weight and body composition by age group according to the complete-case analysis (n=962). Values are estimated marginal mean (95% CI) in changes from baseline in percentage of body weight (a), percentage of body weight (b), fat mass (c), and percentage of fat mass (d). Younger adults: 25–45 years; middle-aged adults: 46–54 years; older adults: 55–70 years. Analyses were performed using a linear mixed model including sex, age, ethnicity, baseline BMI, baseline smoking status, baseline alcohol drinking, baseline values of the outcome being considered, baseline energy intake and physical activity, time-varying changes in energy intake and physical activity from baseline, intervention arm, time and interaction of time and age group as fixed covariates and participant identifier and intervention centre as random effects. Post hoc multiple comparisons with Bonferroni adjustment were performed to compare age groups at each time point, where appropriate. Older vs younger adults \* $p < 0.05$ , \*\* $p < 0.01$  and \*\*\* $p < 0.001$ ; middle-aged vs younger adults † $p < 0.05$ ; older vs middle-aged adults ‡ $p < 0.05$



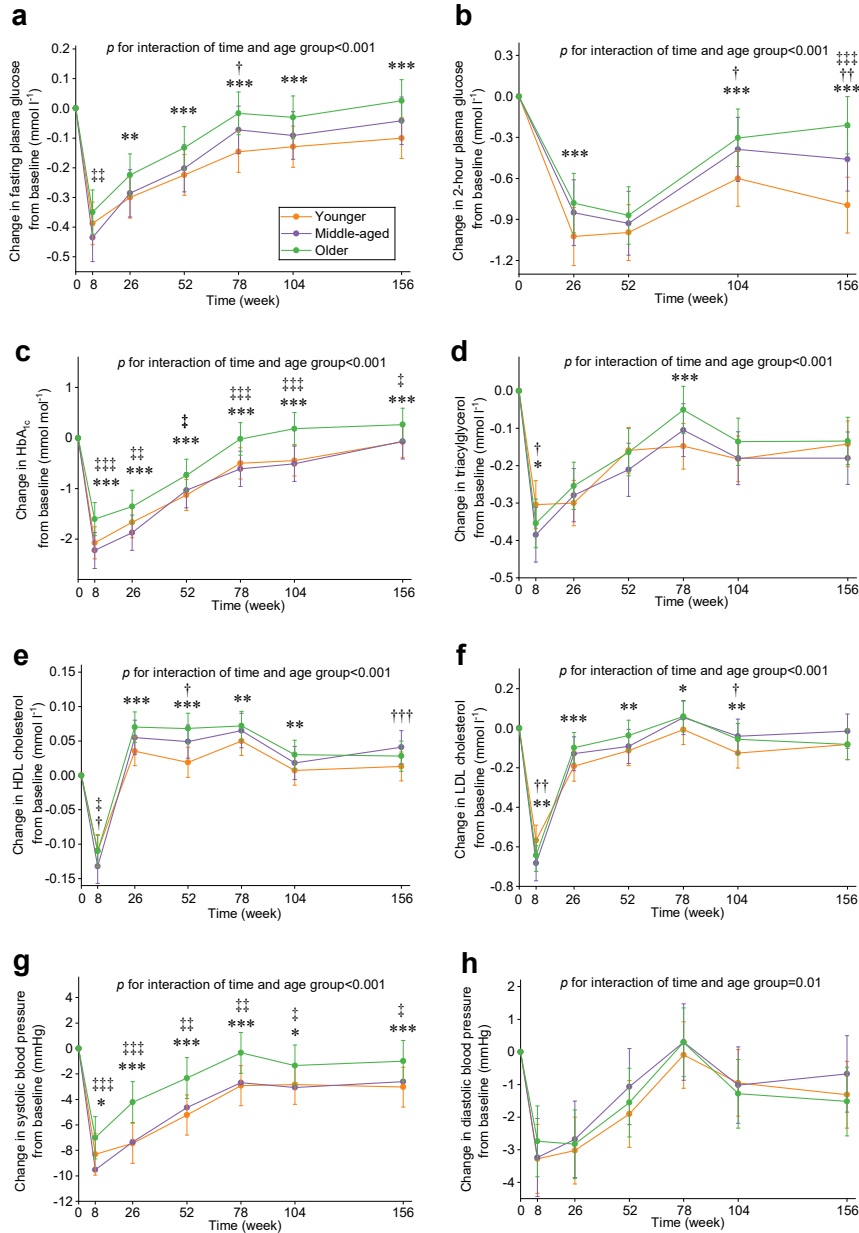

**ESM Fig. 3** Weight loss-unadjusted changes in cardiometabolic health markers from baseline by age group (n=2223). Values are estimated marginal mean (95% CI) in changes from baseline in fasting plasma glucose (a), 2h plasma glucose (b), HbA<sub>1c</sub> (c), triglycerides (d), HDL-cholesterol (e), LDL-cholesterol (f), systolic blood pressure (g), and diastolic blood pressure (h). Younger adults: 25–45 years; middle-aged adults: 46–54 years; older adults: 55–70 years. Analyses were performed using a linear mixed model including sex, age, ethnicity, baseline BMI, smoking status, alcohol drinking, baseline values of the outcome being considered, baseline energy intake and physical activity, time-varying changes in energy intake and physical activity from baseline, intervention arm, time and interaction of time and age group as covariates effects and participant identifier and intervention centre as random effects. Post hoc multiple comparisons with Bonferroni adjustment were performed to compare age groups at each time point. Older vs younger adults \* $p < 0.05$ , \*\* $p < 0.01$  and \*\*\* $p < 0.001$ ; middle-aged vs younger adults † $p < 0.05$ , †† $p < 0.01$  and ††† $p < 0.001$ ; older vs middle-aged adults ‡ $p < 0.05$ , ‡‡ $p < 0.01$  and ‡‡‡ $p < 0.001$

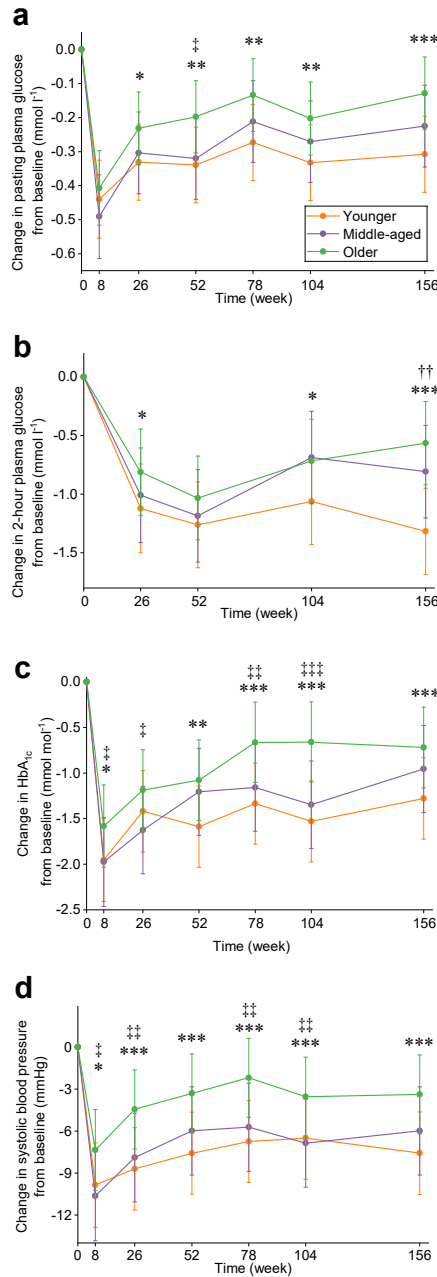

**ESM Fig. 4** Weight loss-adjusted changes in cardiometabolic health markers from baseline by age group according to the complete-case analysis (n=962). Values are estimated marginal mean (95% CI) in changes from baseline in fasting plasma glucose (**a**), 2h plasma glucose (**b**), HbA<sub>1c</sub> (**c**), and systolic blood pressure (**d**). Younger adults: 25–45 years; middle-aged adults: 46–54 years; older adults: 55–70 years. Analyses were performed using a linear mixed model including sex, age, ethnicity, baseline BMI, smoking status, alcohol drinking, baseline values of the outcome being considered, baseline energy intake and physical activity, time-varying changes in energy intake and physical activity from baseline, time-varying percentage weight loss from baseline, intervention arm, time and interaction of time and age group as covariates effects and participant identifier and intervention centre as random effects. Post hoc multiple comparisons with Bonferroni adjustment were performed to compare age groups at each time point. Older vs younger adults \* $p < 0.05$ , \*\* $p < 0.01$  and \*\*\* $p < 0.001$ ; middle-aged vs younger adults † $p < 0.01$ ; older vs middle-aged adults † $p < 0.05$ , †† $p < 0.01$  and ††† $p < 0.001$

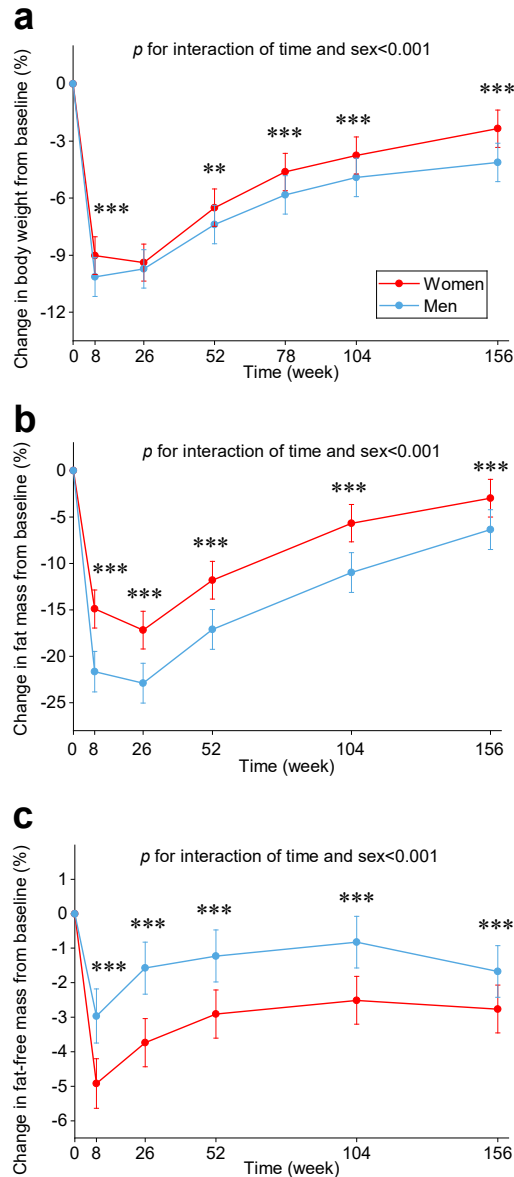

**ESM Fig. 5** Changes in body weight and body composition from baseline in women and men (n=2223). Values are estimated marginal mean (95% CI) in changes from baseline in percentage of body weight (**a**), percentage of fat mass (**b**), and percentage of fat-free mass (**c**). Analyses were performed using a linear mixed model including sex, age, ethnicity, baseline BMI, baseline smoking status, baseline alcohol drinking, baseline values of the outcome being considered, baseline energy intake and physical activity, time-varying changes in energy intake and physical activity from baseline, intervention arm, time and interaction of time and sex as fixed covariates and participant identifier and intervention centre as random effects. Post hoc pairwise comparisons (independent samples *t* tests) were performed to compare women and men at each time point. Women vs men  $**p < 0.01$  and  $***p < 0.001$

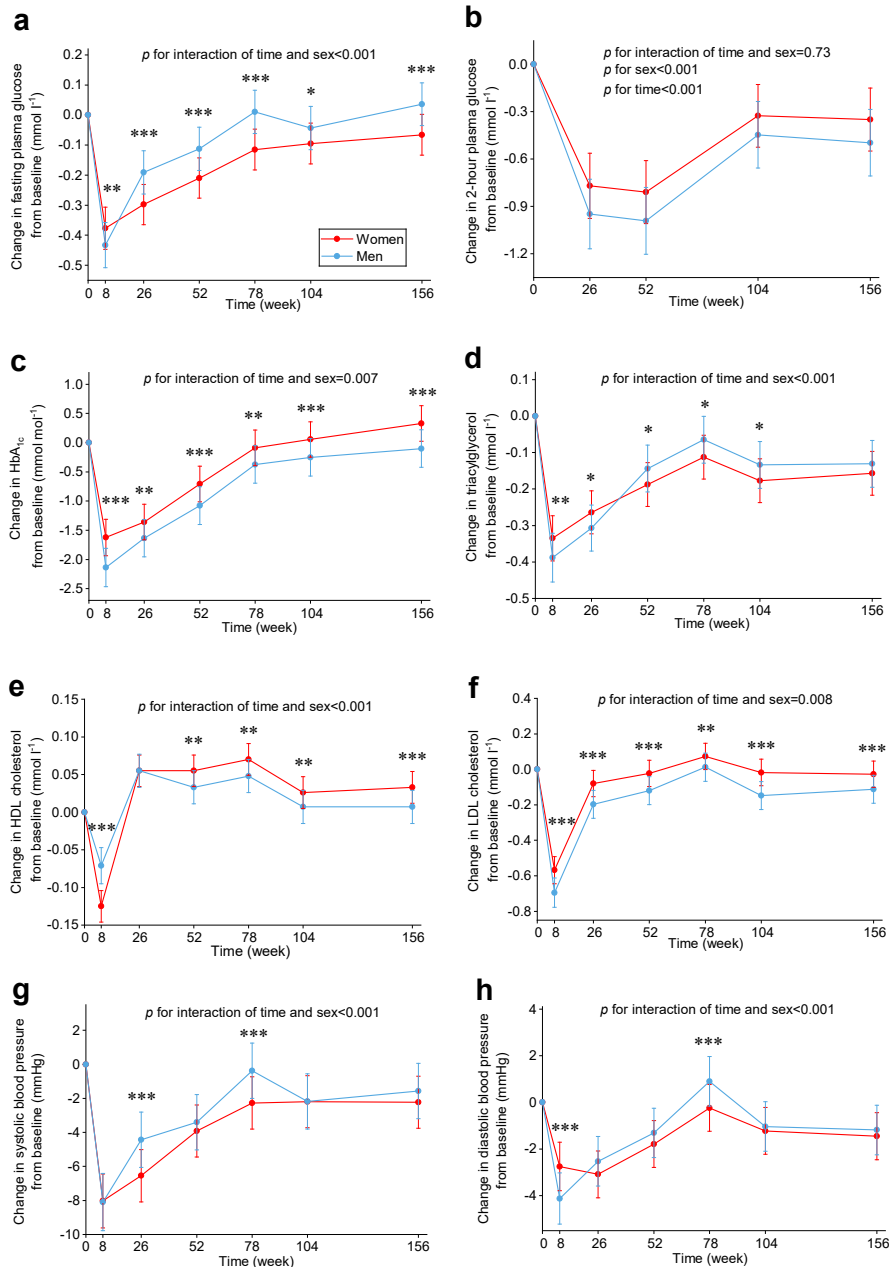

**ESM Fig. 6** Weight loss-unadjusted changes in cardiometabolic health markers from baseline in women and men ( $n=2223$ ). Values are estimated marginal mean (95% CI) in changes from baseline in fasting plasma glucose (a), 2h plasma glucose (b), HbA<sub>1c</sub> (c), triglycerides (d), HDL cholesterol (e), LDL cholesterol (f), systolic blood pressure (g), and diastolic blood pressure (h). Analyses were performed using a linear mixed model including sex, age, ethnicity, baseline BMI, baseline smoking status, baseline alcohol drinking, baseline values of the outcome being considered, baseline energy intake and physical activity, time-varying changes in energy intake and physical activity from baseline, intervention arm, time and interaction of time and sex as fixed covariates and participant identifier and intervention centre as random effects. Post hoc pairwise comparisons (independent samples  $t$  tests) were performed to compare women and men at each timepoint, where appropriate. Women vs men \* $p < 0.05$ , \*\* $p < 0.01$  and \*\*\* $p < 0.001$

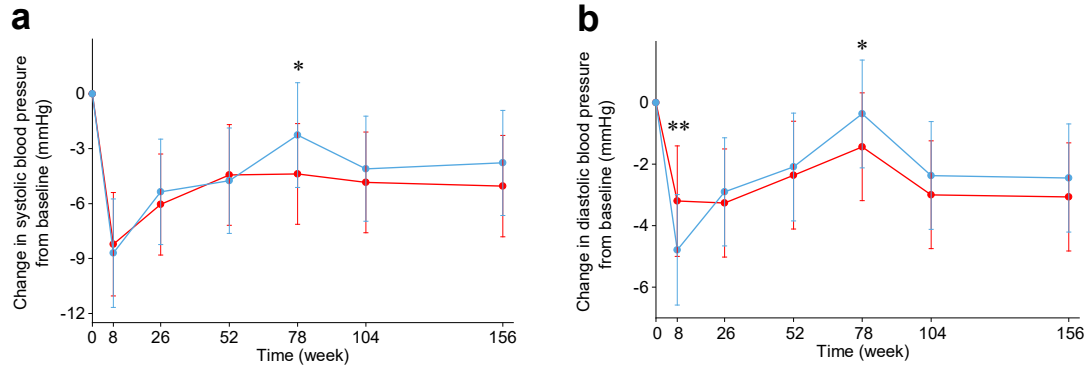

**ESM Fig. 7** Weight loss-adjusted changes in cardiometabolic health markers from baseline in women and men according to the complete-case analysis (n=962). Values are estimated marginal mean (95% CI) in changes from baseline in systolic blood pressure (**a**) and diastolic blood pressure (**b**). Analyses were performed using a linear mixed model including sex, age, ethnicity, baseline BMI, baseline smoking status, baseline alcohol drinking, baseline values of the outcome being considered, baseline energy intake and physical activity, time-varying changes in energy intake and physical activity from baseline, time-varying percentage weight loss from baseline, intervention arm, time and interaction of time and sex as fixed covariates and participant identifier and intervention centre as random effects. Post hoc pairwise comparisons (independent samples *t* tests) were performed to compare women and men at each timepoint, where appropriate. Women vs men \**p* < 0.05, \*\**p* < 0.01 and \*\*\**p* < 0.001
